# Supplementary material for: Pathway-based metabolomics study of sarcopenia-related traits in two US cohorts
Source: publisher site journal article supplement (doi:10.18632/aging.203926), 2022-03-02
Supplement: Supplementary file [file aging-v14i5-203926-supplementary-material-SD1.pdf]

## SUPPLEMENTARY TABLE

**Supplementary Table 1. Retention times and MRM transitions of metabolites quantified by LC-MS/MS.**

| Analyte                                                   | Ion transition ( <i>m/z</i> ) | Declustering potential (V) | Collision energy (eV) | Retention time (min) |
|-----------------------------------------------------------|-------------------------------|----------------------------|-----------------------|----------------------|
| Serine                                                    | 106.00 > 60.00                | 10                         | 21                    | 1.19                 |
| Proline                                                   | 116.00 > 70.00                | 60                         | 21                    | 1.25                 |
| L-Proline- <sup>13</sup> C <sub>5</sub> , <sup>15</sup> N | 122.10 > 75.00                | 60                         | 21                    | 1.25                 |
| 4-Hydroxyproline                                          | 132.00 > 86.00                | 10                         | 21                    | 1.20                 |
| Ornithine                                                 | 133.10 > 70.00                | 6                          | 21                    | 1.02                 |
| Aspartic acid                                             | 134.0 > 74.00                 | 61                         | 25                    | 1.22                 |
| L-Aspartic acid-2,3,3-d <sub>3</sub>                      | 137.10 > 75.00                | 60                         | 21                    | 1.22                 |
| Urocanic acid                                             | 139.00 > 93.00                | 6                          | 21                    | 1.44                 |
| Glutamine                                                 | 147.00 > 84.00                | 60                         | 21                    | 1.19                 |
| Glutamic acid                                             | 148.00 > 84.00                | 60                         | 21                    | 1.20                 |
| Histidine                                                 | 156.00 > 110.00               | 6                          | 21                    | 1.03                 |
| Arginine                                                  | 175.10 > 70.00                | 1                          | 45                    | 1.19                 |
| N-Acetyl-L-aspartic acid                                  | 176.10 > 134.00               | 31                         | 15                    | 1.59                 |
| Carnosine                                                 | 227.10 > 110.00               | 41                         | 37                    | 0.99                 |
